# Supplementary material for: Ce–Metal–Organic Framework-Derived CeO2–GO: An Efficient Electrocatalyst for Oxygen Evolution Reaction
Source: MDPI journal article supplement (doi:10.3390/inorganics11040161), 2023-04-11
Supplement: s1 [file s1]

## **Supplementary Information**

# **Ce–Metal–Organic Framework-Derived CeO<sub>2</sub>–GO: An Efficient Electrocatalyst for Oxygen Evolution Reaction**

### **Materials and methods**

#### *Chemicals*

Analytical reagents (cerium nitrate hexahydrate, trimesic acid, ruthenium oxide) were purchased from Sigma-Aldrich and used directly. Ethanol was purchased from Duksan, South Korea. Graphene oxide (GO) was purchased from Standard Graphene (South Korea) and used directly without further purification.

#### *Characterization*

Powder XRD (PANalytical X'Pert PRO, USA) with a Cu K radiation source (1.5405) was used to determine the phase purity and crystallinity of the synthesized samples. The functional groups of the electrocatalysts were identified using Fourier transform infrared (Perkin Elmer Spectrum Two spectrophotometer) in attenuated total reflectance mode. The morphologies of the catalysts were investigated using scanning electron microscopy (Hitachi S-4800, equipped with a field emission gun, Japan), and high-resolution transmission electron microscopy (FEI Tecnai G2 F20 S-TWIN, equipped with a 200-kV Schottky field-emission gun, USA). The elemental compositions of the catalysts were determined by X-ray photoelectron spectroscopy (Thermo Fisher Scientific K-alpha, USA) using Al K $\alpha$  radiation (1486.6 eV). The BET-specific surface area of the electrocatalysts was measured using a Belsorp II-mini (BEL, Japan Inc.).

#### *Electrode preparation and electrocatalytic performance*

The electrode ink was prepared using an 8:1:1 ratio of electrocatalyst, carbon black, and polyvinylidene fluoride binder, respectively, in n-methyl-2-pyrrolidone solvent and sonicated for 45 min to obtain a uniform dispersion. The ink was then dispersed on Ni foam (2 cm  $\times$  1 cm) and dried overnight at 60 °C in a vacuum oven. Pt mesh and Hg/HgO were used as the counter and reference electrodes, respectively. KOH (1.0 M) was used as the electrolyte. Oxygen evolution reaction polarization curves were obtained using linear sweep voltammetry at a scan rate of 5 mV s<sup>-1</sup>. The stability tests were performed using chronoamperometry.

The electrochemically active surface area (ECSA) of the synthesized electrocatalysts, which was proportional to the electrochemical double-layer capacitance ( $C_{dl}$ ), was determined from the CV curves in the non-Faradaic region. The ECSA was calculated using the equation:

$$ECSA = C_{dl}/C_s, \quad (S1)$$

where  $C_s$  is the general specific capacitance ( $0.04 \text{ mF cm}^{-2}$ ) obtained from a previous report on metal electrodes in aqueous KOH solutions [1]. The CV curves of the electrocatalysts were recorded in the non-Faradaic region at 0.15–0.20 V against Hg/HgO. The plot of the charging current density ( $i_c$ ) as a function of the scan rate for each sample is a straight line, and the slope of the line is equal to the  $C_{dl}$  value of the catalyst.

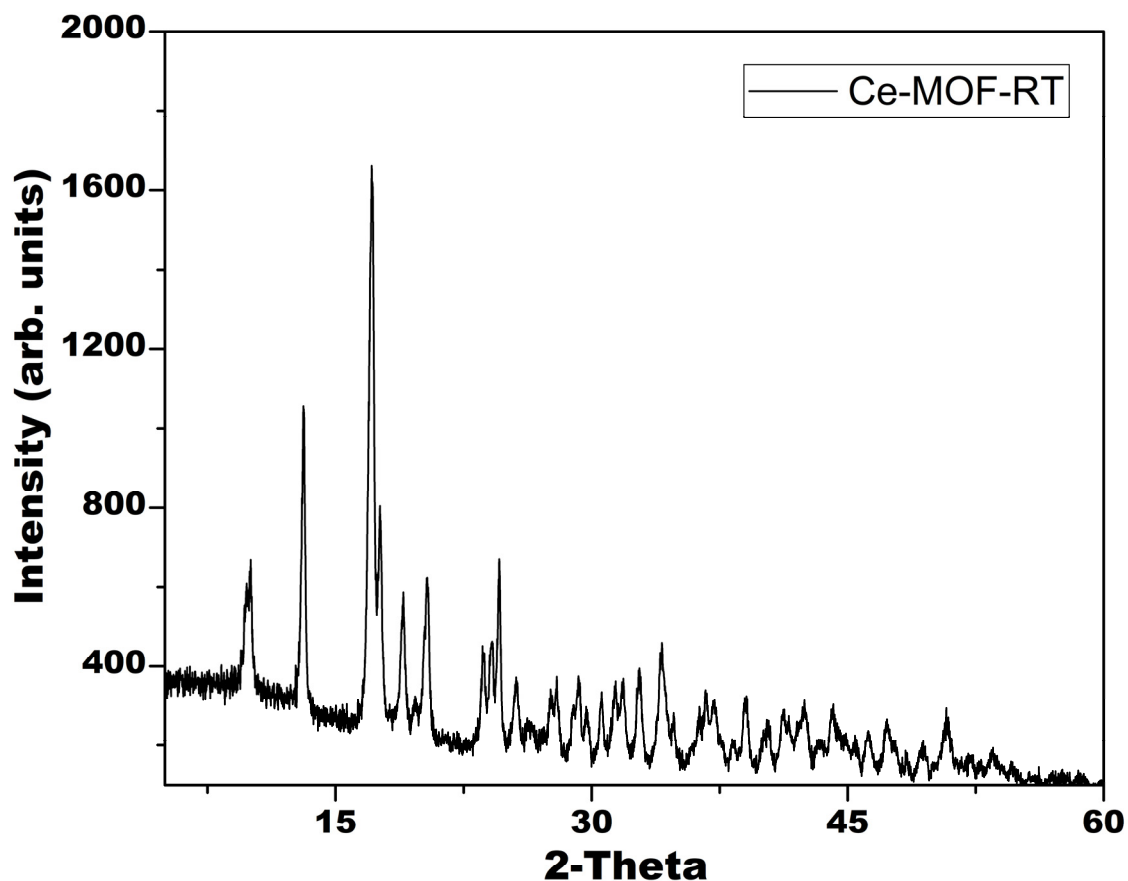

Figure S1. XRD pattern of the pristine Ce-MOF.

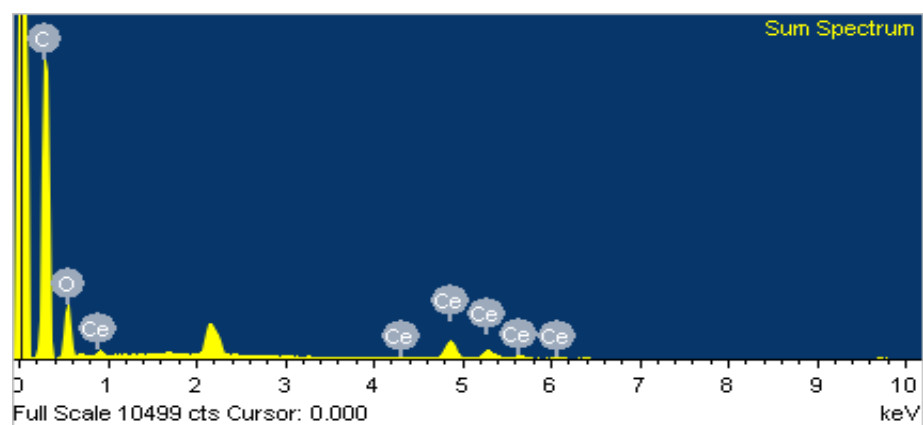

**Figure S2.** EDS analysis of CeO<sub>2</sub>-GO-3 electrocatalyst.

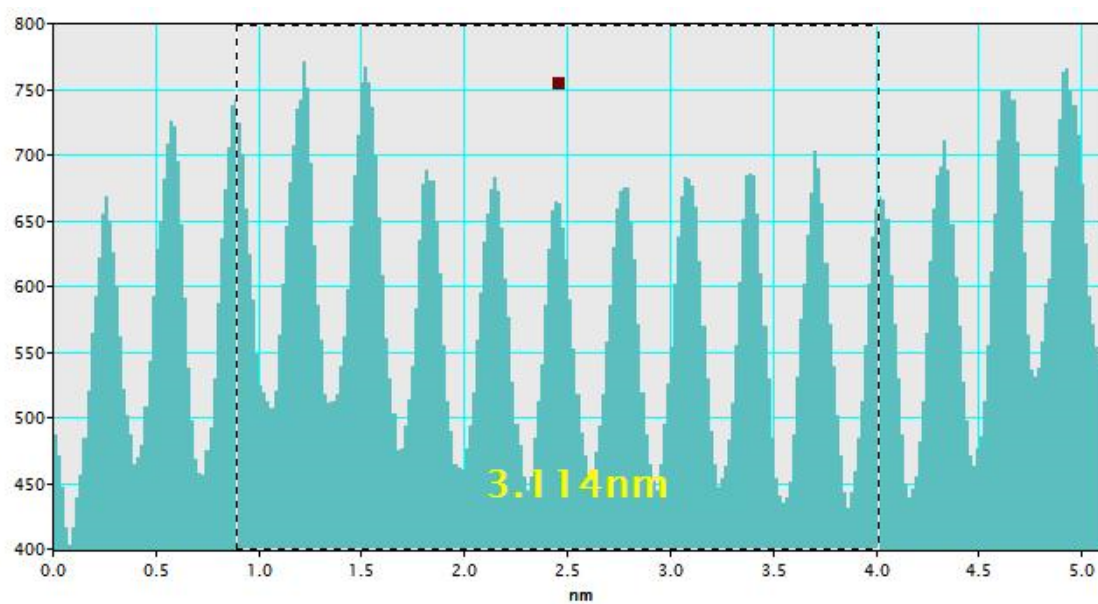

**Figure S3.** d-spacing line profiles corresponding to the 0.311 (111) plane.

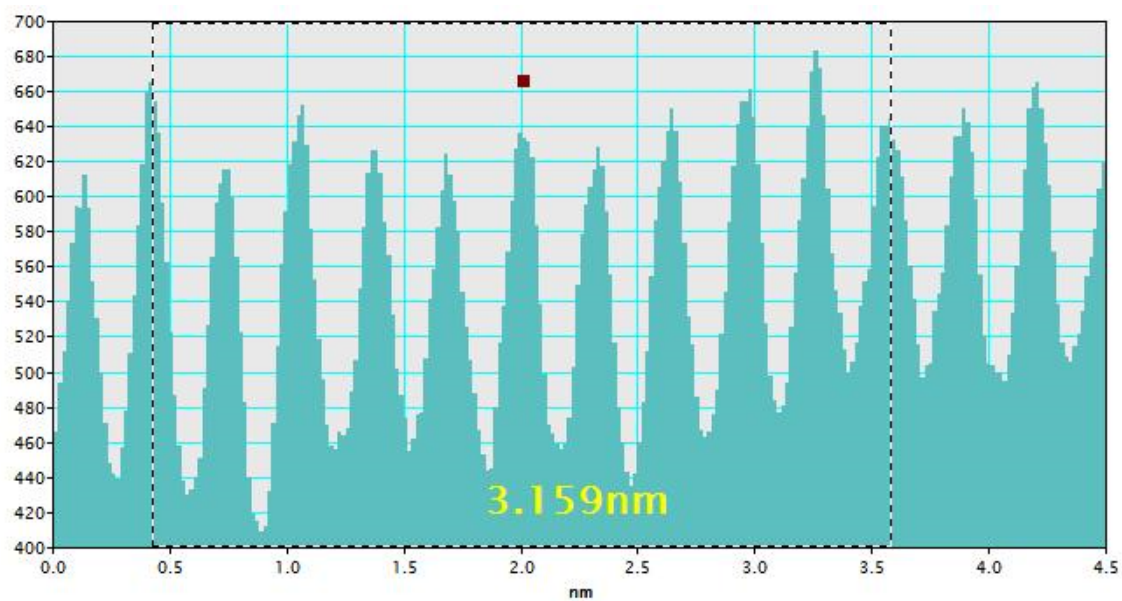

**Figure S4.** d-spacing line profiles corresponding to the 0.315 (111) plane.

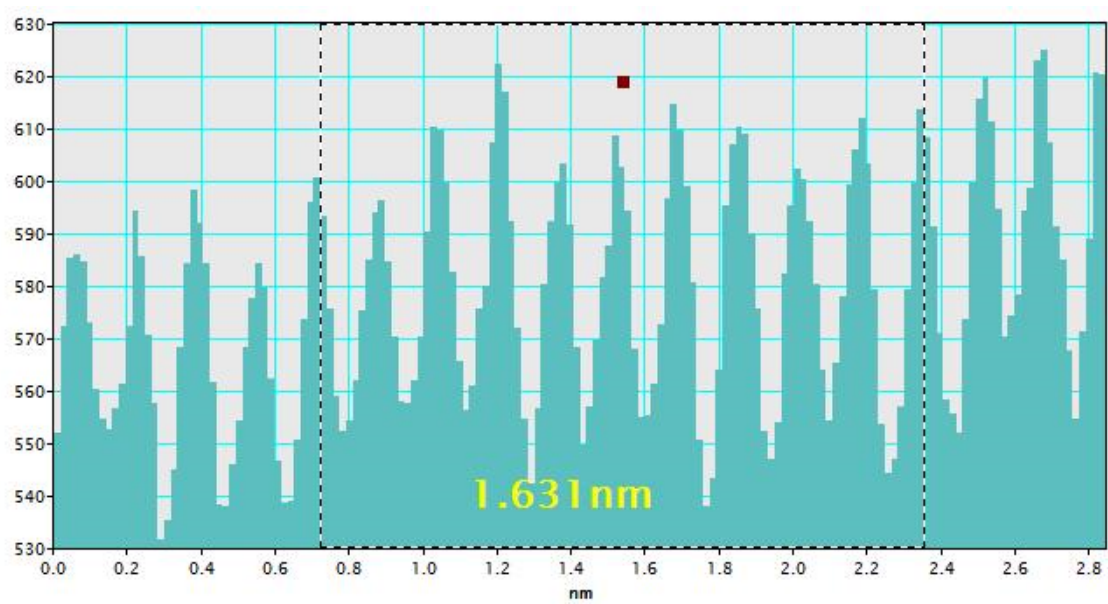

**Figure S5.** d-spacing line profiles corresponding to the 0.163 (311) plane.

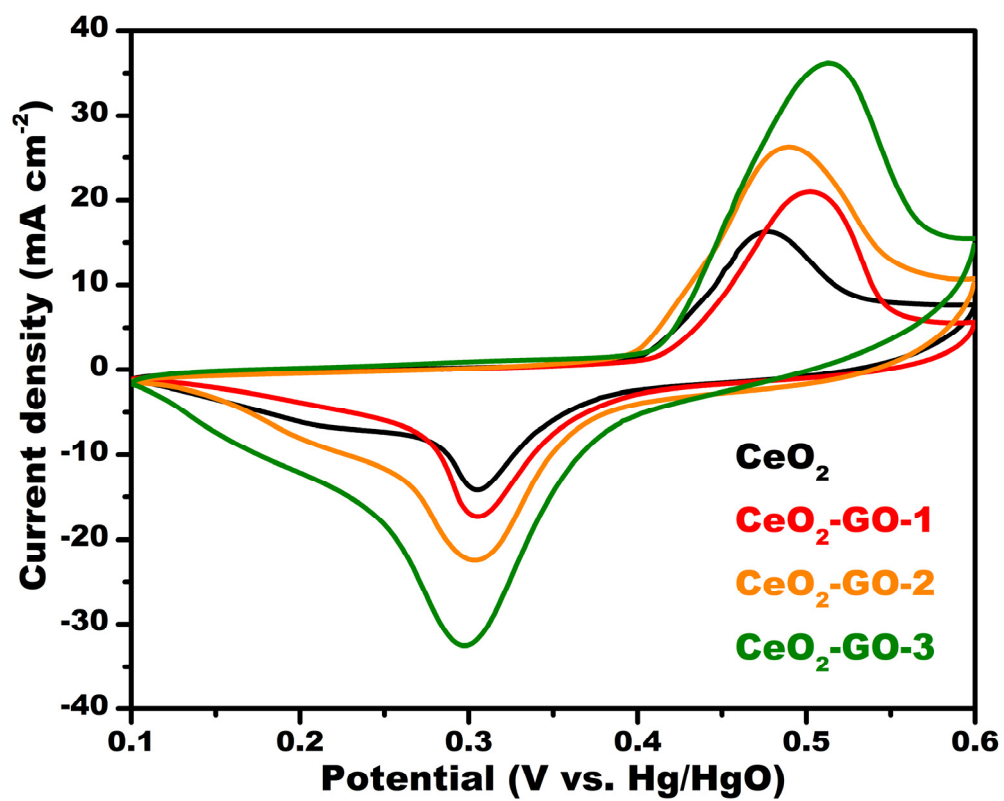

Figure S6. Comparative CV curves at standard scan rate in aqueous 1.0 M KOH electrolyte.

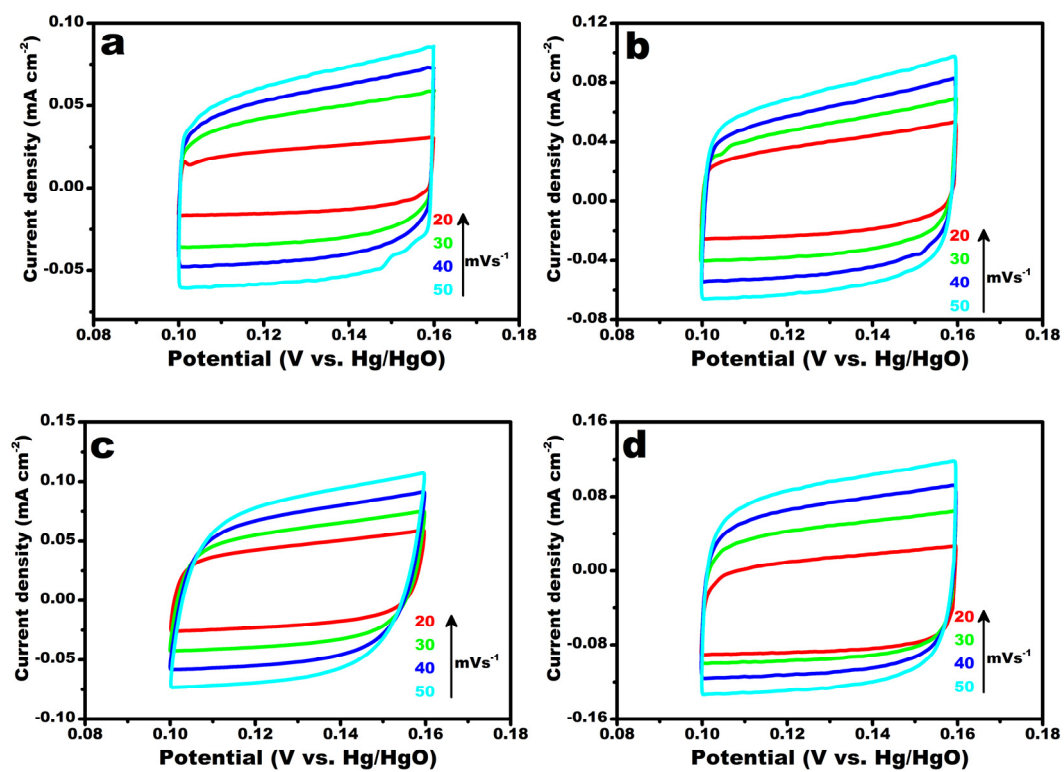

**Figure S7.** CV curves of the electrocatalysts in (a) 1.0 M KOH; CeO<sub>2</sub>, (b) CeO<sub>2</sub>-GO-1, (c) CeO<sub>2</sub>-GO-2, and (d) CeO<sub>2</sub>-GO-3.

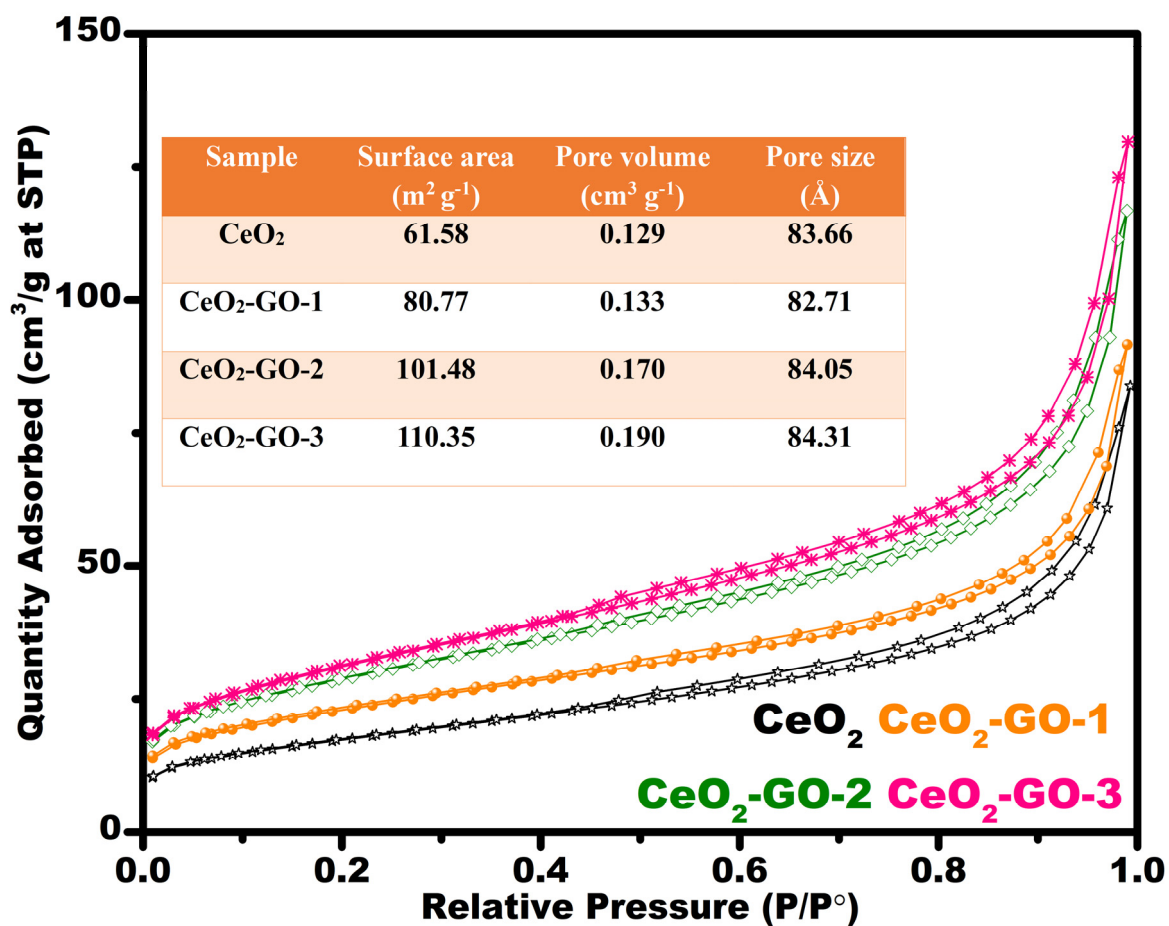

**Figure S8.** N<sub>2</sub> adsorption–desorption profiles of CeO<sub>2</sub>, CeO<sub>2</sub>–GO-1, CeO<sub>2</sub>–GO-2, and CeO<sub>2</sub>–GO-3. The inset shows the determined BET parameters.

**Table S1.** EIS fitted values and the equivalent circuit.

| Electrocatalyst        | Series resistance (R <sub>s</sub> ) (Ω) | Charge transfer resistance (R <sub>ct</sub> ) (Ω) |
|------------------------|-----------------------------------------|---------------------------------------------------|
| CeO <sub>2</sub>       | 0.89                                    | 10.05                                             |
| CeO <sub>2</sub> -GO-1 | 0.88                                    | 6.23                                              |
| CeO <sub>2</sub> -GO-2 | 0.88                                    | 4.69                                              |
| CeO <sub>2</sub> -GO-3 | 0.87                                    | 3.51                                              |

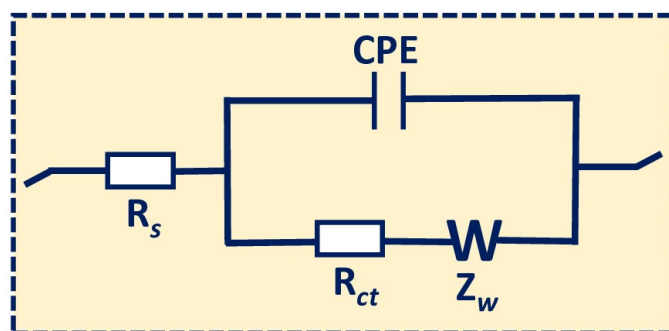

Table S2. Comparison of OER performance of different electrocatalysts.

| Electrocatalyst                                                                        | Electrolyte | Over potential (10 mA/cm <sup>2</sup> ) vs RHE | Tafel slope (mV dce <sup>-1</sup> ) | Ref           |
|----------------------------------------------------------------------------------------|-------------|------------------------------------------------|-------------------------------------|---------------|
| CeO <sub>2</sub> -Ru                                                                   | 0.5 M KOH   | 420                                            | 122                                 | 2             |
| CeO <sub>2</sub> /Co(OH) <sub>2</sub> hybrid catalysts (HCs)                           | 1.0 M KOH   | 410                                            | 66                                  | 3             |
| Ce-NiO-E                                                                               | 1.0 M KOH   | 382                                            | 118.7                               | 4             |
| Co <sub>3</sub> O <sub>4</sub> /CeO <sub>2</sub> nanohybrids (NHs)                     | 1.0 M KOH   | 270                                            | 60                                  | 5             |
| Ce-MOF                                                                                 | 1.0 M KOH   | 316                                            | 96                                  | 6             |
| GO@Ce-MOF                                                                              | 1.0 M KOH   | 311                                            | 68                                  |               |
| Calcinated Ce-MOF                                                                      | 1.0 M KOH   | 309                                            | 58                                  |               |
| Calcinated GO@Ce-MOF                                                                   | 1.0 M KOH   | 287                                            | 39                                  |               |
| CeO <sub>x</sub> /CoO <sub>x</sub>                                                     | 1.0 M NaOH  | 331                                            | 66                                  | 7             |
| H-Co <sub>3</sub> O <sub>4</sub> /CeO <sub>2</sub> @N-doped carbon nanofibers (N-CNFs) | 0.1 M KOH   | 310                                            | 85                                  | 8             |
| CeO <sub>2</sub> @ N-doped carbon (NC)-900                                             | 0.1 M KOH   | 413                                            | 167                                 | 9             |
| CeO <sub>2</sub> -supported Co/nitrogen-doped carbon nanorods (N-CNR)                  | 0.1 M KOH   | 410                                            | 90                                  | 10            |
| CuO <sub>x</sub> -CeO <sub>2</sub> /C                                                  | 0.1 M KOH   | 580                                            | 177                                 | 11            |
| CeO <sub>2</sub>                                                                       | 1.0 M KOH   | 420                                            | 261                                 | Present study |
| CeO <sub>2</sub> -GO-1                                                                 | 1.0 M KOH   | 360                                            | 293                                 |               |
| CeO <sub>2</sub> -GO-2                                                                 | 1.0 M KOH   | 300                                            | 185                                 |               |
| CeO <sub>2</sub> -GO-3                                                                 | 1.0 M KOH   | 240                                            | 176                                 |               |



## References

1. Nagajyothi, P.C.; Yoo, K.; Eom, I.Y.; Shim, J. CoFe<sub>2</sub>O<sub>4</sub> NPs supported on graphitic carbon nitride as inexpensive electrocatalysts for methanol oxidation reaction, *Cerami. Int.* **2022**, *48*, 11623-11628.
2. Demir, E.; Akbayrak, S.; Önal, A.M.; Özkaz, S. Ceria supported ruthenium (0) nanoparticles: Highly efficient catalysts in oxygen evolution reaction, *J. Colloidal Int. Sci.* **2019**, *534*, 704-701.
3. Sung, M. C.; Lee, G. H.; Kim, D. W. CeO<sub>2</sub>/Co(OH)<sub>2</sub> hybrid electrocatalyst for efficient hydrogen and oxygen evolution reaction, *J. Alloys Compd.* **2019**, *800*, 450-455.
4. Gao, W.; Xia, Z.; Cao, F.; Ho, J.C.; Jiang, Z.; Qu, Y. Comprehensive understanding of the spatial configurations of CeO<sub>2</sub> in NiO for the electrocatalytic oxygen evolution reaction: Embedded or surface-loaded, *Adv. Funct. Mater.* **2018**, *28*, 1706056.
5. Liu, Y.; Ma, C.; Zhang, Q.; Wang, W.; Pan, P.; Gu, L.; Xu, D.; Bao, J.; Dai, Z. 2D electron gas and oxygen vacancy induced high oxygen evolution performances for advanced Co<sub>3</sub>O<sub>4</sub>/CeO<sub>2</sub> nanohybrids, *Adv. Mater.* **2019**, *31*, 190006.
6. Malik, W.M.A.; Afaq, S.; Mahmood, A.; Niu, L.; Yousaf ur Rehman, M.; Ibrahim, M.; Mohyuddin, A.; Qureshi, A.M.; Ashiq, M.N.; Chughtai, A.H. A facile synthesis of CeO<sub>2</sub> from the GO@Ce-MOF precursor and its efficient performance in the oxygen evolution reaction. *Front. Chem.* **2022**, *10*, 996560. <https://doi.org/10.3389/fchem.2022.996560>.
7. Kim, J.H.; Shin, K.; Kawashima, K.; Youn, D. H.; Lin, J.; Hong, T. E.; Liu, Y.; Wygant, B. R.; Wang, J.; Henkelman, G.; Mullins, C. B. Enhanced activity promoted by CeO<sub>x</sub> on a CoO<sub>x</sub> electrocatalyst for the oxygen evolution reaction. *ACS Catal.* **2018**, *8*, 4257-4265.
8. Li, T.; Li, S.; Liu, Q.; Tian Y.; Zhang Y.; Fu, G.; Tang Y. Hollow Co<sub>3</sub>O<sub>4</sub>/CeO<sub>2</sub> heterostructures in situ embedded in N-Doped carbon nanofibers enable outstanding oxygen evolution, *ACS Sustainable Chem. Eng.* **2019**, *7*, 17950-17957.
9. Kang, Y.; Wang, W.; Li, J.; Mi, Y.; Gong, H.; Lei, Z. 3D *Rosa Centifolia*-like CeO<sub>2</sub> encapsulated with N-doped carbon as an enhanced electrocatalyst for Zn-Air Batteries, *J. Colloid Interface Sci.* **2020**, *578*, 796-804.
10. Sivanantham, A.; Ganesan, P.; Shanmugam, S. A Synergistic Effect of Co and CeO<sub>2</sub> in nitrogen-doped carbon nanostructure for the enhanced oxygen electrode activity and stability, *Appl. Catal. B-Environ.* **2018**, *237*, 1148-1159.
11. Goswami, C.; Yamada, Y.; Matus, E. V.; Ismagilov, I. Z.; Kerzhentsev, M.; Bharali, P. Elucidating the role of oxide-oxide/carbon interfaces of CuO<sub>x</sub>-CeO<sub>2</sub>/C in boosting electrocatalytic performance, *Langmuir* **2020**, *36*, 15141-15152.
